# Supplementary material for: The role of substrate pre-stretch in post-wrinkling bifurcations
Source: Royal Society of Chemistry journal article supplement (doi:10.1039/c4sm01038h), 2014-07-21
Supplement: c4sm01038h5.pdf [file c4sm01038h5.pdf]

**Supporting Information for:**

**The role of substrate pre-stretch in post-wrinkling bifurcations**

Anesia Auguste<sup>1</sup>, Lihua Jin<sup>2</sup>, Zhigang Suo<sup>2,\*</sup>, Ryan C. Hayward<sup>1,\*</sup>

<sup>1</sup>Department of Polymer Science & Engineering, University of Massachusetts, Amherst, MA, 01003, USA. \*E-mail: rhayward@mail.pse.umass.edu

<sup>2</sup>School of Engineering and Applied Sciences, Kavli Institute for Nanobio Science and Technology, Harvard University, Cambridge, MA, 02138, USA. \*E-mail: suo@seas.harvard.edu

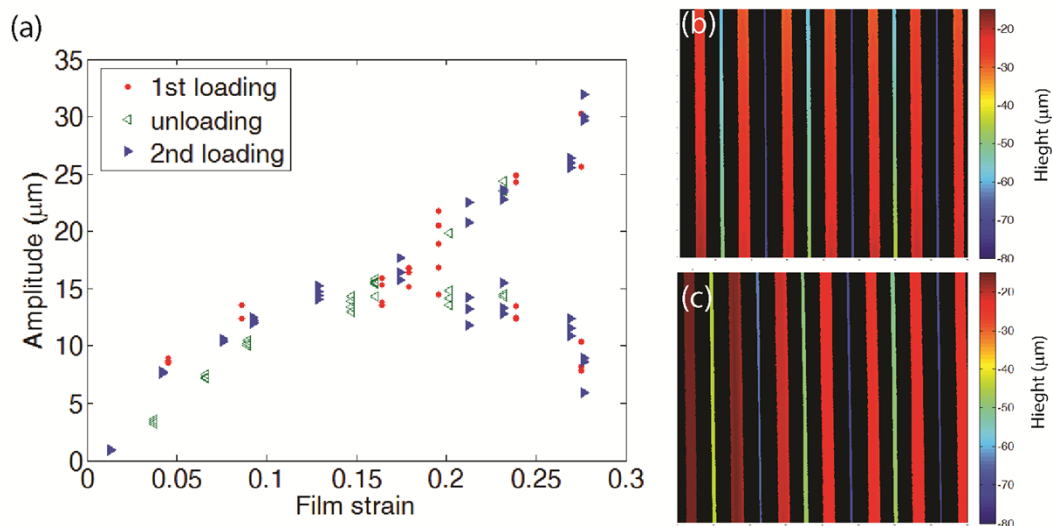

**Figure S1.** (a) Bifurcation curves for  $\lambda_0 = 1.0$  show no detectable hysteresis from the first loading cycle to unloading and subsequent reloading. Optical profilometry images of the surface (b) during the first loading at a film strain of 0.24, and (c) during the second loading at a film strain of 0.23.

**Videos**

**Video S1.** The surface line profile (left) is shown as a function of position transverse to the direction of compression, as denoted by the solid line on the 2D profile (right), for a sample with a substrate pre-stretch of 0.7 that exhibits chaotic post-wrinkling.

**Video S2.** Simulation result for period doubling of wrinkles with a substrate pre-stretch of 0.7 and a modulus ratio of the film to substrate of 50.

**Video S3.** Simulation result for period tripling of wrinkles with a substrate pre-stretch of 0.7 and a modulus ratio of the film to substrate of 50.

**Video S4.** Simulation result for period quadrupling of wrinkles with a substrate pre-stretch of 0.7 and a modulus ratio of the film to substrate of 50.
